# Supplementary material
Source: ML conference proceedings conference paper supplement (https://openreview.net/forum?id=rZEM7ULs5x5)

No augmentation

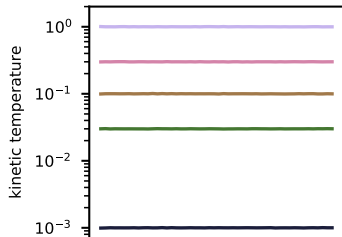

Avg logits (finite)

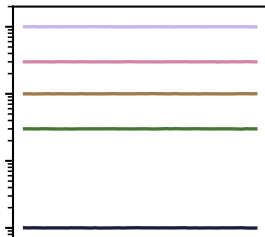

Avg logits (full)

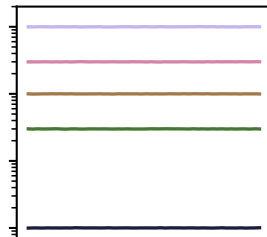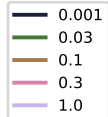

Augment, no avg

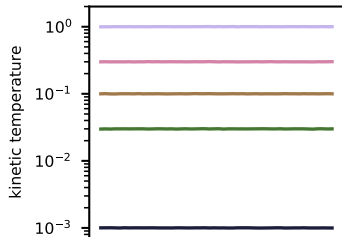

Avg probs (finite)

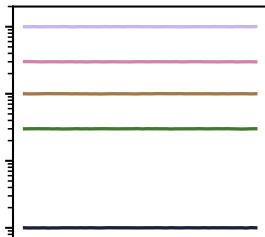

Avg probs (full)

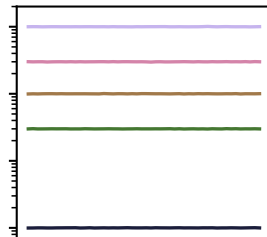

Supplement: supplementary_material [file attachment]
