# Supplementary material
Source: ML conference proceedings conference paper supplement (https://openreview.net/forum?id=rZEM7ULs5x5)
Supplement: supplementary_material [file attachment]

Full orbit

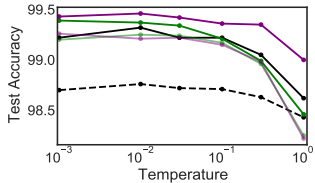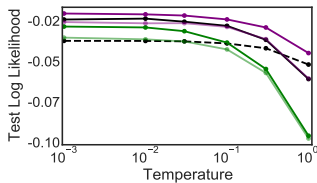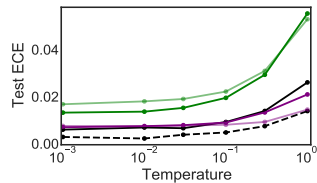

Finite orbit

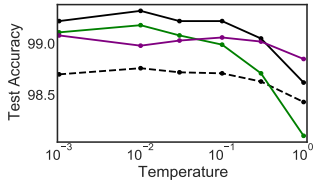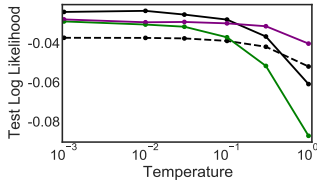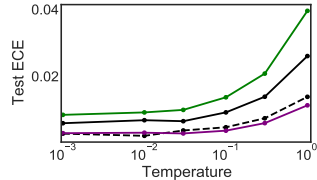

Standard protocol (no test aug)

— Train augmentation

- - - No train augmentation

— Average probs ( $K_{\text{test}} = 8$ )

— Average logits ( $K_{\text{test}} = 8$ )

—  $K_{\text{train}} = 8$

—  $K_{\text{train}} = 1$
