# Supplementary material
Source: ML conference proceedings conference paper supplement (https://openreview.net/forum?id=rZEM7ULs5x5)

test log-likelihood  
test accuracy (%)

CIFAR-10

CIFAR-100

Fashion-MNIST

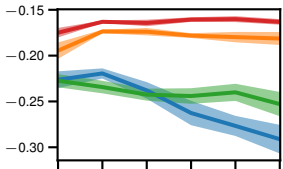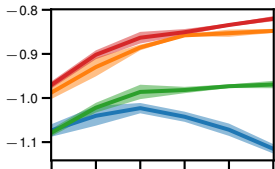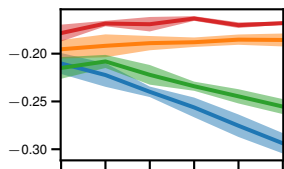

Average  
logits,  
*no test augs*

Average  
logits,  
 $K_{test} = 10$

Average  
probabilities,  
*no test augs*

Average  
probabilities,  
 $K_{test} = 10$

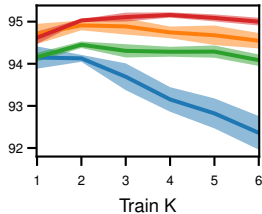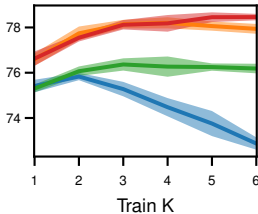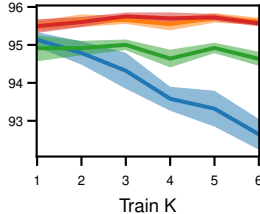

Supplement: supplementary_material [file attachment]
