# Supplementary material
Source: ML conference proceedings conference paper supplement (https://openreview.net/forum?id=rZEM7ULs5x5)

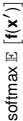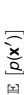

Supplement: supplementary_material [file attachment]

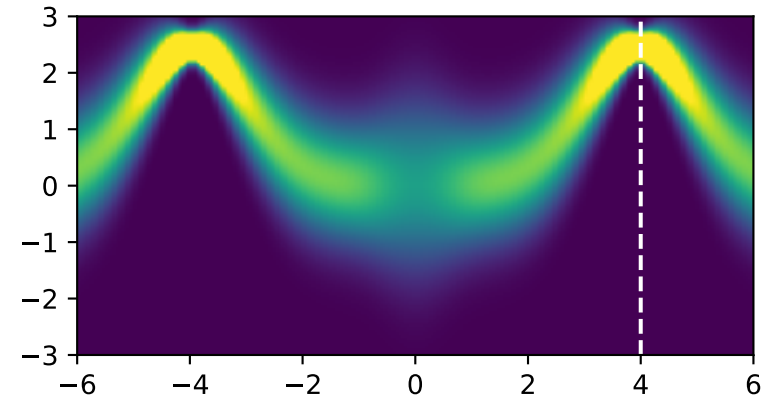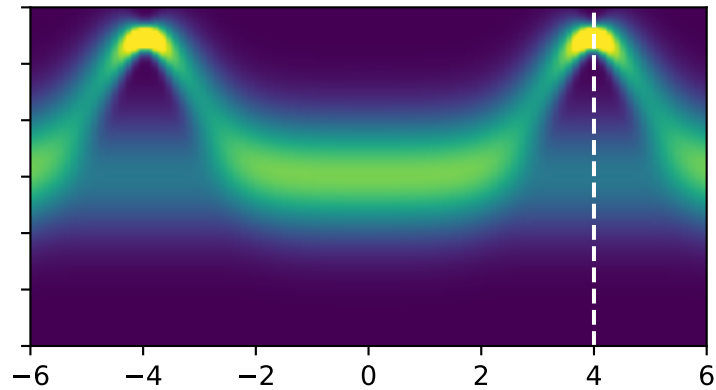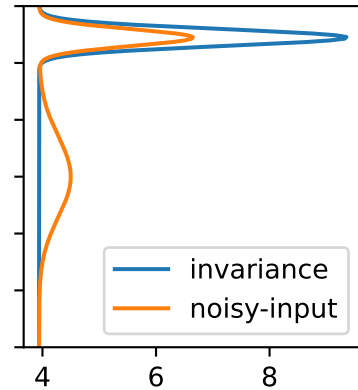

Supplement: supplementary_material [file attachment]

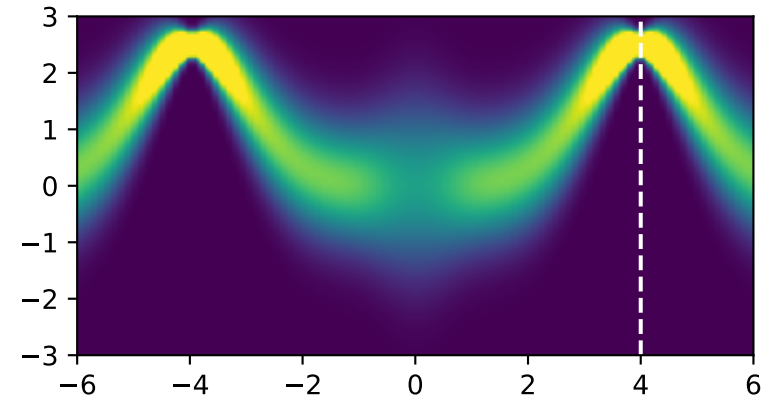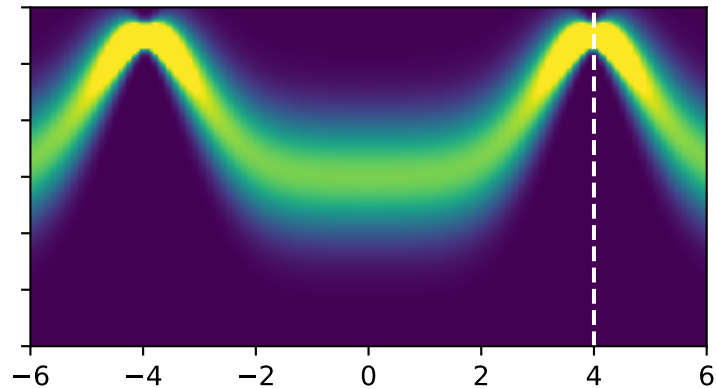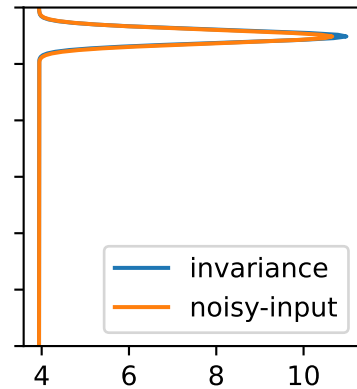

Supplement: supplementary_material [file attachment]

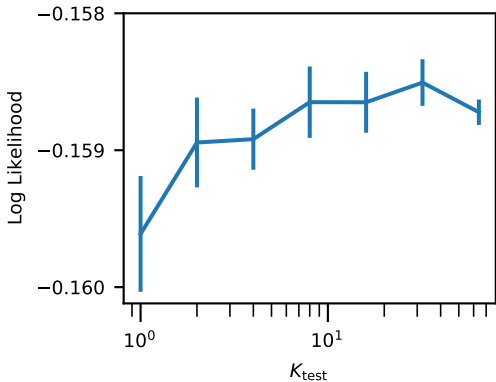

Supplement: supplementary_material [file attachment]

CIFAR10, ResNet20

Full orbit

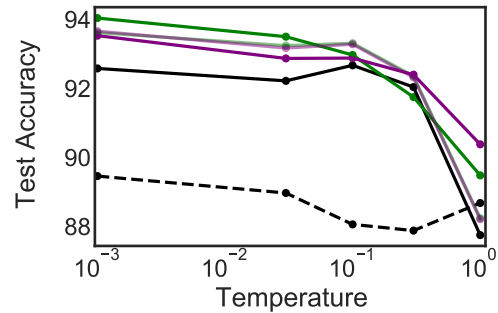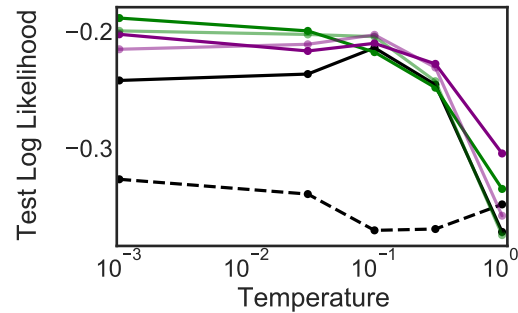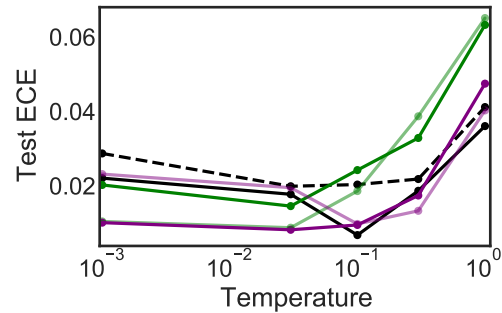

Finite orbit

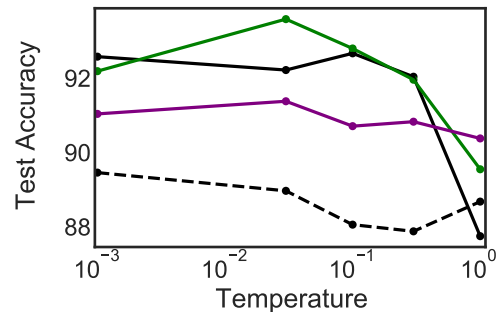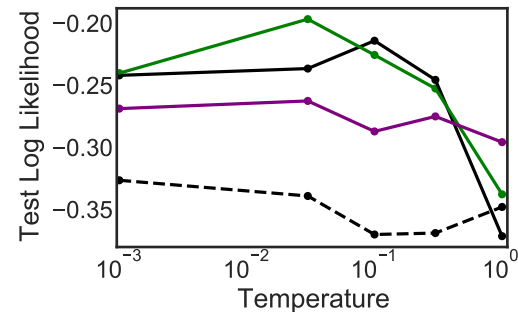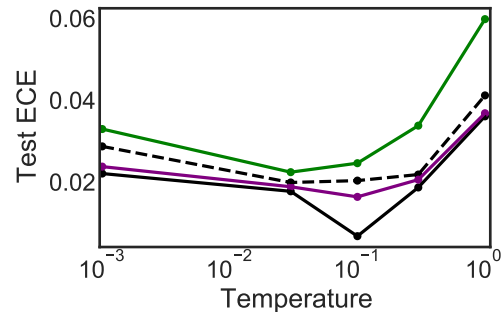

Supplement: supplementary_material [file attachment]

CIFAR-10, ResNet20

Full orbit

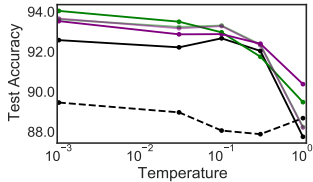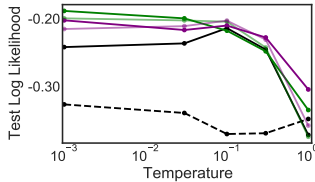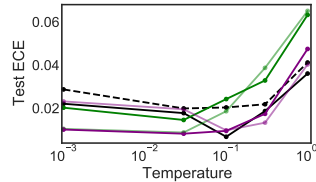

Finite orbit

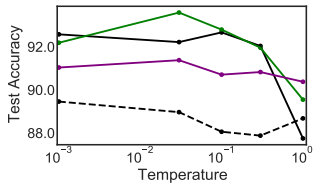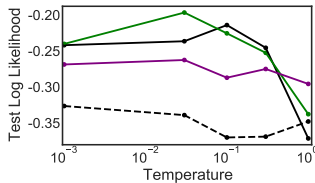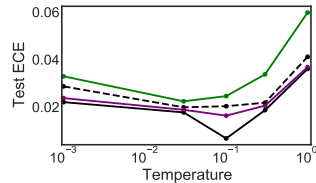

Supplement: supplementary_material [file attachment]
